# Supplementary material
Source: PubMed Central journal article supplement (PMC2781661)
Supplement: supp_M109.000729_jbc.M109.000729-1.pdf [file supp_M109.000729_jbc.M109.000729-1.pdf]

Supplementary material

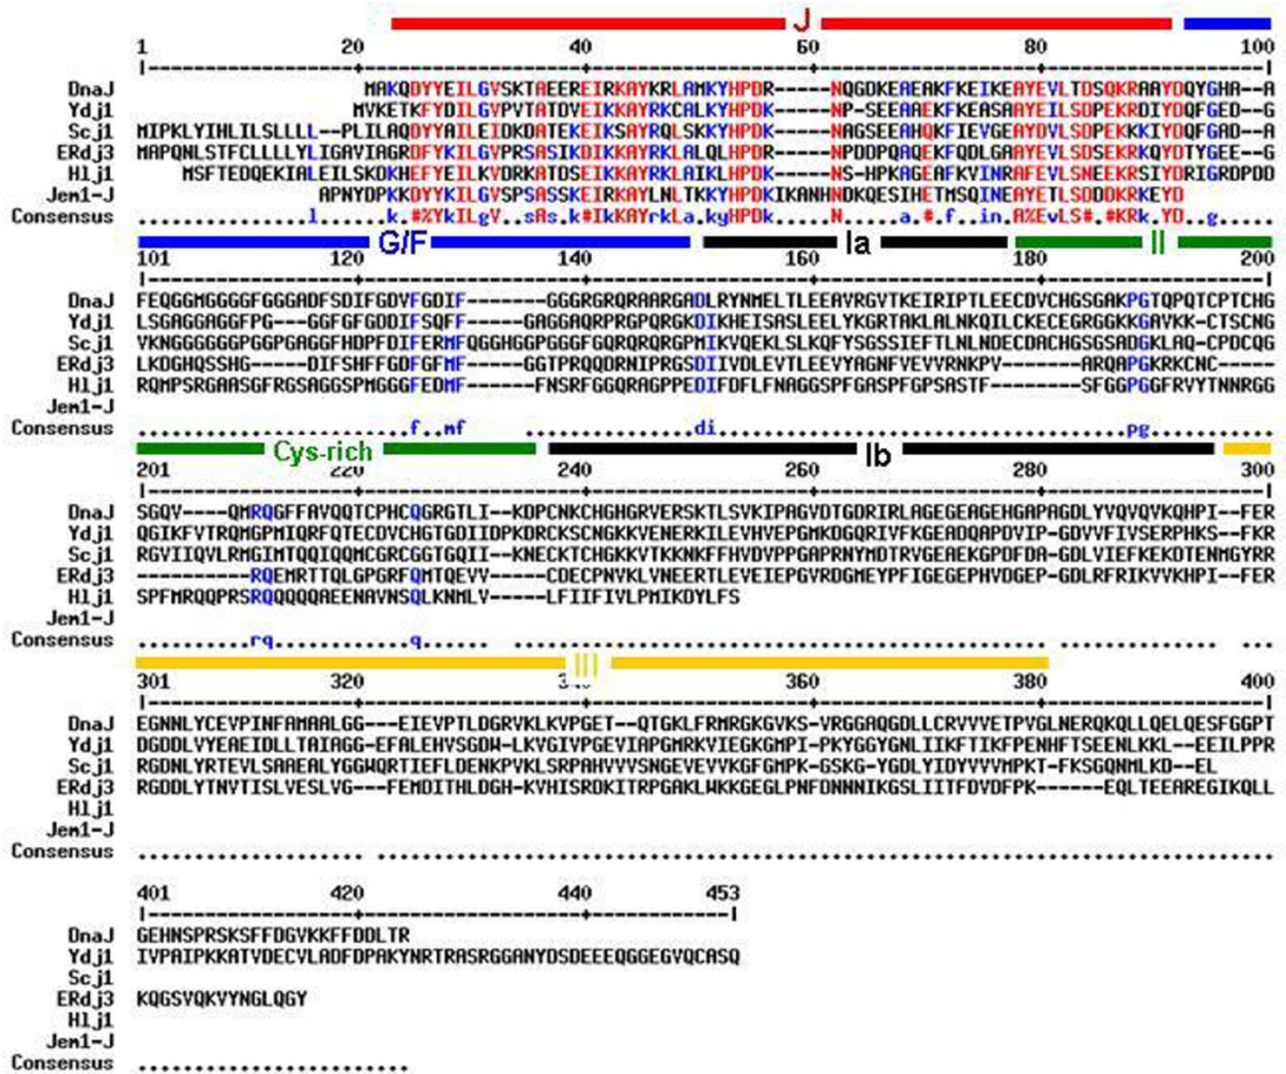

**Fig. S1. Sequence comparison of DnaJ, Ydj1, Scj1, ERdj3, Hlj1 and the J domain of Jem1.** The protein sequences of DnaJ (AAC73126), Ydj1 (CAA95937), Scj1 (CAA41529), ERdj3 (NP\_057390), Hlj1 (NP\_013884) and the J domain of Jem1 (amino acids 531-645; NP\_012462) were aligned using the software Multalin<sup>1</sup>. The numbers in parantheses indicate NCBI accession numbers. The various domains are represented by: J- J domain; G/F- glycine/ phenylalanine rich domain; Ia and Ib- domain I; II- domain II; III- domain III. Amino acid notations in the row that indicates the consensus sequence include: !- isoleucine or valine; \$- leucine or methionine; %- phenylalanine or tyrosine; #- asparagine, aspartate, glutamine or glutamate. Where indicated throughout the main text, % sequence identity was calculated using the program Kalign<sup>2</sup>.

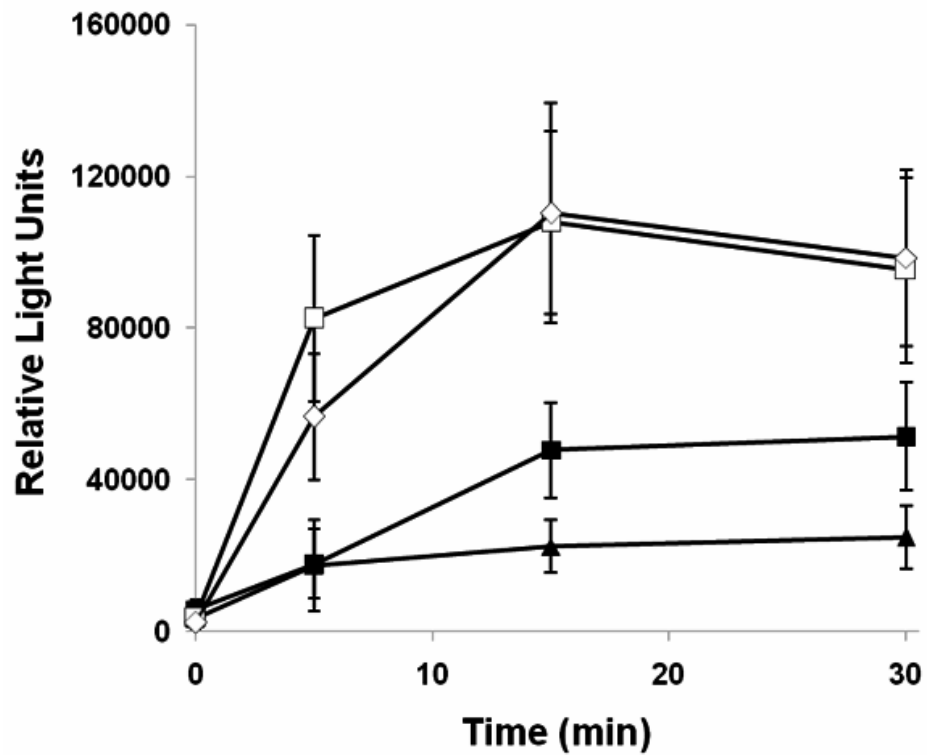

**Fig. S2: Ydj1 enhances the ability of BiP to refold denatured substrates.** The refolding of chemically-denatured firefly luciferase was monitored at 30°C in reactions containing 1 mM ATP in the absence (▲) or presence of 2  $\mu$ M BiP either without (■) or with 2  $\mu$ M Ydj1 (□) or 2  $\mu$ M ERdj3 (◇). Data represent the means of a minimum of three independent experiments  $\pm$  standard errors.

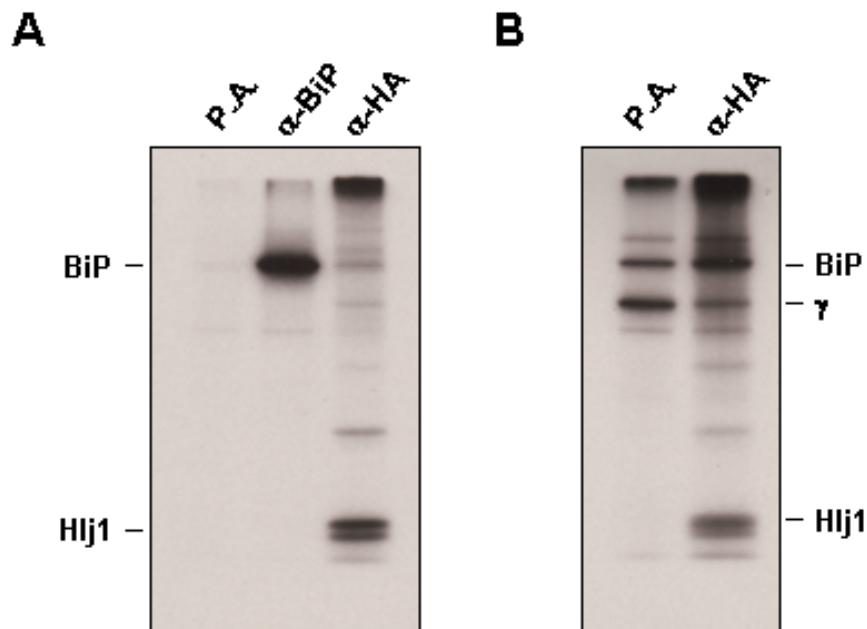

**Fig. S3: Hlj1 interacts poorly with BiP and  $\gamma$ HC in the mammalian ER.** (A) COS cells were co-transfected with cDNAs encoding BiP and HA-tagged Hlj1. Metabolically labeled, DSP cross-linked cell lysates were immunoprecipitated with anti-HA or anti-BiP antibodies, or Protein A Sepharose alone. Isolated proteins were separated by denaturing gel electrophoresis. (B) COS cells were co-transfected with cDNAs encoding  $\gamma$ HC and HA-tagged Hlj1. Cell lysates were immunoprecipitated with Protein A Sepharose beads which directly bind to the  $\gamma$ HC, or with anti-HA antibodies. Samples were analyzed as described in (A).

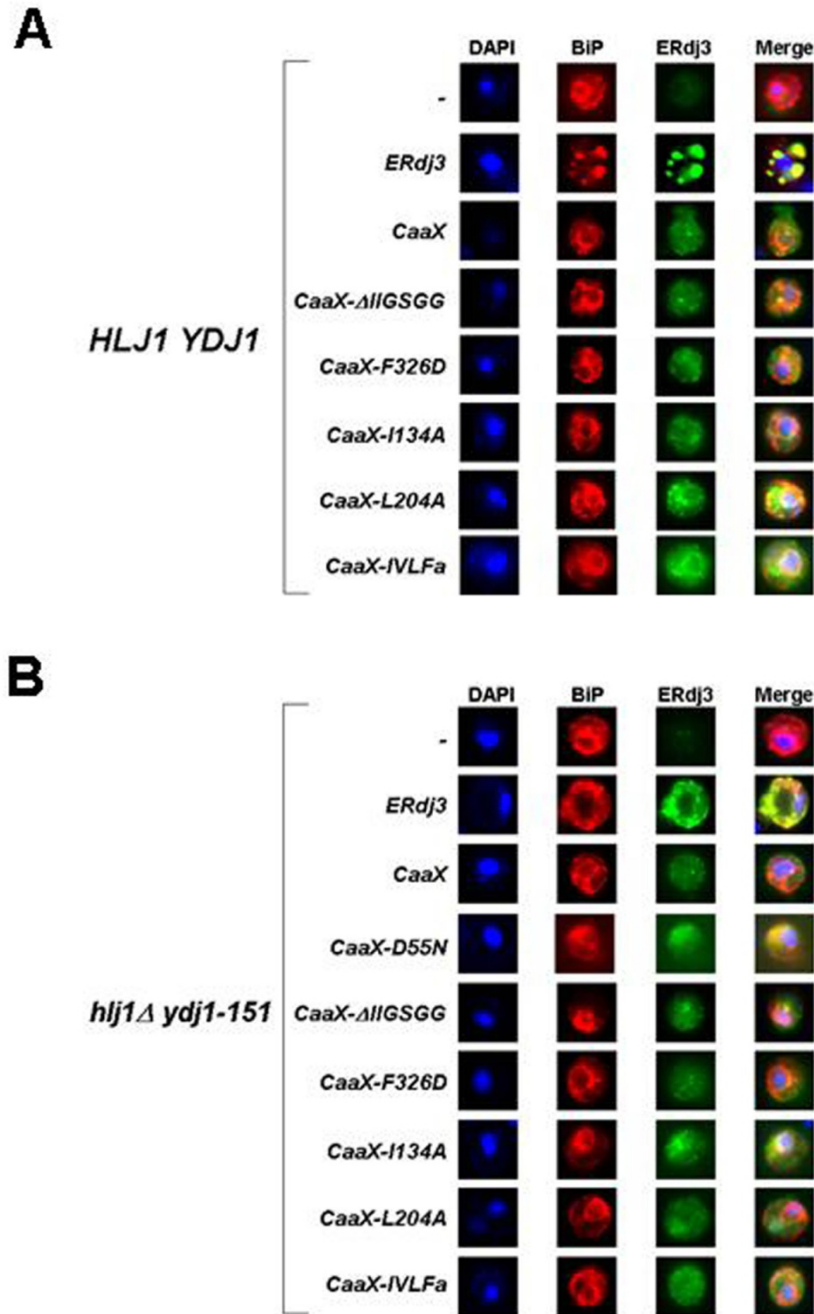

**Fig. S4. Expression of the various wild-type and mutant ERdj3 proteins in yeast.** Wild-type *HLJ1YDJ1* and mutant *hlj1Δ ydj1-151* yeast strains containing an empty vector (-), or expression vectors for an ER-targeted form of ERdj3 (*ERdj3*), an ER-tethered cytosolically localized form of full-length ERdj3 (*CaaX*) or *CaaX* mutants (*CaaX-D55N*, *CaaX-ΔIIGSGG*, *CaaX-F326D*, *CaaX-L204A* and *CaaX-IVLFa*) were stained with antibodies against ER-luminal Kar2p (TRITC-labeled secondary antibody) and ERdj3 (FITC-labeled secondary antibody). DAPI was used to visualize the nuclear DNA. Indirect immunofluorescence microscopy was performed as previously described<sup>3</sup>.

### Supplementary References

1. Corpet, F. (1988) *Nucleic Acids Res* **16**, 10881-10890.
2. Labarga, A., Valentin, F., Andersson, M. and Lopez, R. (2007) *Nucleic Acids Research Web Services Issue 2007*.
3. Coughlan, C.M., Walker, J.L., Cochran, J.C., Wittrup, K.D., and Brodsky, J.L. (2004) *J Biol Chem* **279**, 15289-15297.
